# Supplementary material
Source: MDPI journal article supplement (https://www.mdpi.com/2073-4433/14/4/737)
Supplement: s1 [file s1]

## Article

# Atmospheric Deposition around the Industrial Areas of Milazzo and Priolo Gargallo (Sicily–Italy) – Part B: Trace Elements

Filippo Brugnone <sup>1,\*</sup>, Walter D'Alessandro <sup>2</sup>, Francesco Parello <sup>1</sup>, Lorenzo Brusca <sup>2</sup>, Filippo Saiano <sup>3</sup>, Lorenza Li Vigni <sup>1</sup>, Mario Sprovieri <sup>4</sup> and Sergio Calabrese <sup>1,2,\*</sup>

<sup>1</sup> Dipartimento di Scienze della Terra e del Mare, Università degli Studi di Palermo, Via Archirafi, 36, 90123 Palermo, Italy

<sup>2</sup> Istituto Nazionale di Geofisica e Vulcanologia, Section of Palermo Via Ugo la Malfa, 153, 90146 Palermo, Italy

<sup>3</sup> Dipartimento di Scienze Agrarie, Alimentari e Forestali, Università degli Studi di Palermo, Viale delle Scienze ed.4, 90128 Palermo, Italy

<sup>4</sup> Istituto per lo Studio degli Impatti Antropici e Sostenibilità in Ambiente Marino, Consiglio Nazionale delle Ricerche (IAS–CNR), Capo Granitola, Via del Mare, 3, 91021 Torretta Granitola, Italy

\* Correspondence: filippo.brugnone@unipa.it (F.B.); sergio.calabrese@unipa.it (S.C.)

## Supplementary materials

**Table S1.** VWM concentrations ( $\mu\text{g L}^{-1}$ ) for trace elements in both the study areas. Elements with \* are relative to the unfiltered aliquot.

| VWM concentrations ( $\mu\text{g L}^{-1}$ ) | MEL     | SIR     | ARP    | AUG    | PAL    | PRI    | GAB    | LUC    | PAV    | ARC     | MIL    |
|---------------------------------------------|---------|---------|--------|--------|--------|--------|--------|--------|--------|---------|--------|
| Li                                          | 0.088   | 0.146   | 0.118  | 0.117  | 0.064  | 0.109  | 0.134  | 0.092  | 0.086  | 0.121   | 0.184  |
| Li *                                        | 0.131   | 0.188   | 0.152  | 0.144  | 0.097  | 0.141  | 0.179  | 0.148  | 0.136  | 0.152   | 0.243  |
| Difference (%)                              | 50      | 29      | 28     | 23     | 52     | 29     | 34     | 60     | 58     | 26      | 32     |
| Al                                          | 14.223  | 17.272  | 18.259 | 14.587 | 22.713 | 14.784 | 17.080 | 14.412 | 14.394 | 13.931  | 14.426 |
| Al *                                        | 143.682 | 101.841 | 70.822 | 60.536 | 85.529 | 47.222 | 82.166 | 92.488 | 96.039 | 114.664 | 99.689 |
| Difference (%)                              | 910     | 490     | 288    | 315    | 277    | 219    | 381    | 542    | 567    | 723     | 591    |
| Ti                                          | 0.099   | 0.068   | 0.118  | 0.112  | 0.160  | 0.153  | 0.071  | 0.147  | 0.085  | 0.102   | 0.045  |
| Ti *                                        | 1.471   | 1.112   | 0.345  | 0.233  | 0.518  | 0.314  | 0.635  | 0.467  | 0.753  | 0.570   | 0.446  |
| Difference (%)                              | 1387    | 1532    | 194    | 108    | 223    | 105    | 793    | 217    | 786    | 458     | 897    |
| V                                           | 0.620   | 0.683   | 0.686  | 0.671  | 0.548  | 0.613  | 0.717  | 0.472  | 0.524  | 0.829   | 0.615  |
| V *                                         | 0.795   | 0.828   | 0.744  | 0.738  | 0.611  | 0.678  | 0.776  | 0.580  | 0.650  | 1.053   | 0.682  |
| Difference (%)                              | 28      | 21      | 8      | 10     | 11     | 11     | 8      | 23     | 24     | 27      | 11     |
| Cr                                          | 0.040   | 0.052   | 0.057  | 0.055  | 0.034  | 0.046  | 0.083  | 0.033  | 0.044  | 0.086   | 0.050  |
| Cr *                                        | 0.145   | 0.217   | 0.136  | 0.116  | 0.086  | 0.095  | 0.183  | 0.134  | 0.143  | 0.198   | 0.157  |
| Difference (%)                              | 264     | 313     | 139    | 110    | 150    | 106    | 120    | 305    | 225    | 130     | 217    |
| Mn                                          | 2.257   | 1.258   | 1.180  | 1.325  | 2.372  | 1.674  | 2.289  | 2.579  | 2.870  | 2.158   | 2.468  |
| Mn *                                        | 3.698   | 2.314   | 1.583  | 2.215  | 3.294  | 2.296  | 3.061  | 3.695  | 4.884  | 2.929   | 3.203  |
| Difference (%)                              | 64      | 84      | 34     | 67     | 39     | 37     | 34     | 43     | 70     | 36      | 30     |

|                |        |        |        |        |        |        |        |        |        |        |        |
|----------------|--------|--------|--------|--------|--------|--------|--------|--------|--------|--------|--------|
| Fe             | 3.744  | 2.096  | 2.885  | 4.734  | 4.886  | 3.318  | 4.483  | 3.321  | 4.519  | 3.864  | 2.182  |
| Fe *           | 86.867 | 51.792 | 25.781 | 24.078 | 23.414 | 14.571 | 41.254 | 49.144 | 38.771 | 80.386 | 32.061 |
| Difference (%) | 2220   | 2371   | 794    | 409    | 379    | 339    | 820    | 1380   | 758    | 1980   | 1369   |
| Co             | 0.031  | 0.020  | 0.021  | 0.019  | 0.032  | 0.033  | 0.030  | 0.031  | 0.042  | 0.034  | 0.031  |
| Co *           | 0.057  | 0.037  | 0.027  | 0.026  | 0.043  | 0.036  | 0.042  | 0.048  | 0.062  | 0.051  | 0.044  |
| Difference (%) | 84     | 85     | 29     | 41     | 34     | 9      | 37     | 55     | 48     | 53     | 41     |
| Ni             | 0.301  | 0.220  | 0.196  | 0.272  | 0.126  | 0.296  | 0.496  | 0.177  | 0.207  | 0.522  | 0.187  |
| Ni *           | 0.362  | 0.239  | 0.237  | 0.240  | 0.191  | 0.284  | 0.435  | 0.295  | 0.273  | 0.557  | 0.249  |
| Difference (%) | 20     | 9      | 21     | -12    | 51     | -4     | -12    | 66     | 32     | 7      | 33     |
| Cu             | 0.649  | 1.331  | 0.807  | 1.020  | 0.678  | 1.275  | 2.215  | 3.371  | 1.622  | 1.148  | 0.898  |
| Cu *           | 0.947  | 2.012  | 0.889  | 1.015  | 0.805  | 1.206  | 2.033  | 4.424  | 1.849  | 1.133  | 0.980  |
| Difference (%) | 46     | 51     | 10     | 0      | 19     | -5     | -8     | 31     | 14     | -1     | 9      |
| Zn             | 10.927 | 7.564  | 4.760  | 7.470  | 9.214  | 13.344 | 14.916 | 7.306  | 11.374 | 12.065 | 12.393 |
| Zn *           | 21.735 | 13.202 | 6.609  | 10.884 | 15.864 | 23.585 | 20.488 | 10.246 | 15.833 | 15.650 | 18.291 |
| Difference (%) | 99     | 75     | 39     | 46     | 72     | 77     | 37     | 40     | 39     | 30     | 48     |
| As             | 0.077  | 0.075  | 0.064  | 0.070  | 0.063  | 0.077  | 0.118  | 0.069  | 0.073  | 0.083  | 0.080  |
| As *           | 0.095  | 0.090  | 0.070  | 0.076  | 0.078  | 0.086  | 0.155  | 0.081  | 0.096  | 0.104  | 0.094  |
| Difference (%) | 23     | 20     | 9      | 9      | 23     | 11     | 31     | 17     | 31     | 25     | 18     |
| Se             | 0.131  | 0.128  | 0.136  | 0.117  | 0.112  | 0.132  | 0.124  | 0.117  | 0.126  | 0.123  | 0.133  |
| Se *           | 0.206  | 0.237  | 0.235  | 0.209  | 0.205  | 0.276  | 0.242  | 0.266  | 0.298  | 0.255  | 0.296  |
| Difference (%) | 58     | 86     | 73     | 79     | 82     | 109    | 95     | 128    | 137    | 107    | 122    |
| Rb             | 0.216  | 0.227  | 0.245  | 0.203  | 0.162  | 0.247  | 0.220  | 0.175  | 0.163  | 0.200  | 0.234  |
| Rb *           | 0.237  | 0.222  | 0.216  | 0.175  | 0.169  | 0.216  | 0.222  | 0.202  | 0.193  | 0.206  | 0.250  |
| Difference (%) | 10     | -2     | -12    | -14    | 4      | -12    | 1      | 15     | 19     | 3      | 7      |
| Sr             | 10.834 | 15.353 | 13.826 | 13.664 | 11.142 | 11.396 | 16.861 | 14.642 | 13.199 | 18.772 | 23.969 |
| Sr *           | 11.898 | 19.784 | 14.651 | 14.624 | 9.866  | 13.208 | 18.354 | 19.513 | 14.858 | 17.220 | 29.662 |
| Difference (%) | 10     | 29     | 6      | 7      | -11    | 16     | 9      | 33     | 13     | -8     | 24     |
| Mo             | 0.108  | 0.194  | 0.104  | 0.173  | 0.123  | 0.099  | 0.153  | 0.101  | 0.159  | 0.343  | 0.172  |
| Mo *           | 0.179  | 0.221  | 0.151  | 0.204  | 0.175  | 0.143  | 0.174  | 0.153  | 0.186  | 0.205  | 0.202  |
| Difference (%) | 65     | 14     | 46     | 17     | 42     | 45     | 14     | 51     | 17     | -40    | 18     |
| Cd             | 0.016  | 0.012  | 0.010  | 0.011  | 0.009  | 0.017  | 0.019  | 0.013  | 0.020  | 0.017  | 0.015  |
| Cd *           | 0.018  | 0.014  | 0.009  | 0.013  | 0.009  | 0.017  | 0.020  | 0.013  | 0.021  | 0.018  | 0.015  |
| Difference (%) | 12     | 17     | -8     | 23     | 0      | -2     | 6      | 3      | 4      | 5      | -3     |
| Sb             | 0.046  | 0.096  | 0.059  | 0.066  | 0.065  | 0.064  | 0.088  | 0.049  | 0.057  | 0.107  | 0.105  |
| Sb *           | 0.025  | 0.060  | 0.038  | 0.026  | 0.042  | 0.051  | 0.055  | 0.041  | 0.042  | 0.086  | 0.093  |
| Difference (%) | -45    | -37    | -35    | -60    | -35    | -20    | -37    | -16    | -26    | -20    | -12    |
| Cs             | 0.003  | 0.002  | 0.002  | 0.002  | 0.002  | 0.003  | 0.003  | 0.003  | 0.002  | 0.002  | 0.002  |
| Cs *           | 0.007  | 0.005  | 0.004  | 0.003  | 0.004  | 0.004  | 0.005  | 0.007  | 0.006  | 0.006  | 0.005  |
| Difference (%) | 154    | 111    | 79     | 35     | 109    | 42     | 86     | 109    | 155    | 129    | 143    |
| Ba             | 3.478  | 4.388  | 3.352  | 10.848 | 2.353  | 2.567  | 5.881  | 1.591  | 3.073  | 4.142  | 6.446  |
| Ba *           | 4.420  | 5.499  | 4.009  | 12.789 | 2.949  | 2.883  | 6.170  | 2.045  | 3.929  | 4.549  | 7.462  |
| Difference (%) | 27     | 25     | 20     | 18     | 25     | 12     | 5      | 29     | 28     | 10     | 16     |

|                |       |       |       |       |       |       |       |       |       |       |       |
|----------------|-------|-------|-------|-------|-------|-------|-------|-------|-------|-------|-------|
| Tl             | 0.013 | 0.010 | 0.010 | 0.008 | 0.009 | 0.009 | 0.019 | 0.022 | 0.018 | 0.018 | 0.015 |
| Tl *           | 0.013 | 0.011 | 0.010 | 0.009 | 0.009 | 0.010 | 0.019 | 0.023 | 0.019 | 0.019 | 0.018 |
| Difference (%) | -2    | 13    | 1     | 5     | -5    | 8     | 0     | 3     | 3     | 2     | 17    |
| Pb             | 0.161 | 0.063 | 0.103 | 0.080 | 0.066 | 0.169 | 0.300 | 0.092 | 0.257 | 0.149 | 0.249 |
| Pb *           | 0.267 | 0.190 | 0.179 | 0.163 | 0.146 | 0.198 | 0.477 | 0.165 | 0.393 | 0.265 | 0.525 |
| Difference (%) | 66    | 200   | 74    | 103   | 119   | 18    | 59    | 79    | 53    | 78    | 111   |
| U              | 0.002 | 0.003 | 0.002 | 0.002 | 0.003 | 0.003 | 0.002 | 0.002 | 0.001 | 0.003 | 0.002 |
| U *            | 0.005 | 0.006 | 0.003 | 0.004 | 0.004 | 0.004 | 0.003 | 0.003 | 0.004 | 0.004 | 0.003 |
| Difference (%) | 115   | 122   | 43    | 43    | 32    | 51    | 40    | 76    | 192   | 36    | 48    |

**Table S2.** Average crust enrichment factor ( $EF_{\text{crust}}$ ) for 23 trace elements at all the sampling sites. Enrichment values refer to the filtered aliquot; enrichment values refer to the unfiltered aliquot.

| ID  |            | Se  | Sb  | Zn  | B   | Cd | Cu  | Mo | Sr  | As  | Tl  | Ni  | V   | Pb  | Mn  | Ba  | Li  | Co  | Rb  | Cr  | Cs  | Al   | Fe   | Ti   |
|-----|------------|-----|-----|-----|-----|----|-----|----|-----|-----|-----|-----|-----|-----|-----|-----|-----|-----|-----|-----|-----|------|------|------|
| MEL | Filtered   | 490 | 71  | 85  | 72  | 54 | 21  | 28 | 9.3 | 13  | 6.4 | 7.4 | 3.8 | 5.2 | 2.7 | 1.5 | 1.0 | 1.2 | 0.7 | 0.4 | 0.2 | 0.06 | 0.05 | 0.01 |
|     | Unfiltered | 541 | 41  | 100 | 150 | 41 | 15  | 30 | 6.7 | 11  | 3.9 | 5.1 | 3.4 | 3.6 | 1.5 | 1.3 | 1.0 | 0.9 | 0.4 | 0.8 | 0.2 | 0.25 | 0.35 | 0.09 |
| SIR | Filtered   | 338 | 90  | 35  | 45  | 25 | 31  | 26 | 10  | 7.7 | 2.6 | 3.1 | 3.1 | 0.8 | 2.2 | 1.3 | 1.0 | 0.6 | 0.4 | 0.4 | 0.1 | 0.05 | 0.02 | 0.01 |
|     | Unfiltered | 410 | 69  | 38  | 98  | 16 | 23  | 24 | 9.3 | 6.9 | 2.0 | 2.1 | 2.6 | 1.5 | 0.6 | 1.4 | 1.0 | 0.5 | 0.3 | 0.8 | 0.1 | 0.19 | 0.23 | 0.03 |
| ARP | Filtered   | 417 | 68  | 35  | 50  | 30 | 25  | 21 | 10  | 8.8 | 3.6 | 3.2 | 4.2 | 2.9 | 1.3 | 1.3 | 1.0 | 0.7 | 0.6 | 0.5 | 0.1 | 0.06 | 0.02 | 0.01 |
|     | Unfiltered | 476 | 46  | 27  | 112 | 18 | 15  | 22 | 7.3 | 6.8 | 2.7 | 2.4 | 3.3 | 2.5 | 0.6 | 1.1 | 1.0 | 0.5 | 0.4 | 0.6 | 0.1 | 0.17 | 0.17 | 0.02 |
| AUG | Filtered   | 326 | 57  | 44  | 43  | 30 | 26  | 27 | 8.7 | 7.7 | 2.5 | 4.1 | 2.8 | 1.4 | 2.0 | 3.2 | 1.0 | 0.6 | 0.4 | 0.4 | 0.1 | 0.04 | 0.03 | 0.01 |
|     | Unfiltered | 459 | 45  | 51  | 139 | 25 | 16  | 26 | 7.6 | 6.7 | 2.1 | 2.9 | 2.8 | 2.1 | 1.4 | 3.3 | 1.0 | 0.5 | 0.3 | 0.5 | 0.1 | 0.16 | 0.18 | 0.02 |
| PAL | Filtered   | 545 | 127 | 79  | 71  | 39 | 21  | 34 | 12  | 14  | 6.4 | 3.2 | 4.4 | 1.9 | 1.7 | 1.2 | 1.0 | 1.0 | 0.6 | 0.4 | 0.2 | 0.09 | 0.05 | 0.02 |
|     | Unfiltered | 767 | 60  | 87  | 240 | 27 | 17  | 54 | 8.4 | 12  | 3.9 | 3.3 | 3.5 | 2.5 | 1.6 | 1.0 | 1.0 | 0.9 | 0.4 | 0.5 | 0.2 | 0.20 | 0.16 | 0.04 |
| PRI | Filtered   | 523 | 92  | 84  | 58  | 53 | 37  | 22 | 9.2 | 13  | 4.8 | 5.9 | 3.7 | 3.1 | 1.0 | 1.2 | 1.0 | 0.8 | 0.9 | 0.4 | 0.2 | 0.08 | 0.04 | 0.02 |
|     | Unfiltered | 732 | 57  | 114 | 170 | 41 | 26  | 27 | 8.1 | 11  | 3.7 | 4.4 | 3.3 | 3.3 | 1.3 | 1.1 | 1.0 | 0.9 | 0.6 | 0.6 | 0.2 | 0.20 | 0.14 | 0.04 |
| GAB | Filtered   | 320 | 73  | 65  | 39  | 35 | 28  | 21 | 11  | 11  | 4.7 | 5.6 | 3.1 | 3.3 | 2.2 | 1.8 | 1.0 | 0.7 | 0.4 | 0.5 | 0.1 | 0.05 | 0.03 | 0.01 |
|     | Unfiltered | 408 | 45  | 60  | 83  | 30 | 19  | 19 | 9.5 | 11  | 3.7 | 3.8 | 2.5 | 4.6 | 0.9 | 1.5 | 1.0 | 0.6 | 0.3 | 0.8 | 0.1 | 0.18 | 0.20 | 0.03 |
| LUC | Filtered   | 408 | 61  | 45  | 54  | 33 | 77  | 22 | 12  | 9.5 | 7.6 | 2.8 | 2.5 | 1.9 | 2.1 | 0.7 | 1.0 | 0.8 | 0.4 | 0.3 | 0.2 | 0.05 | 0.03 | 0.02 |
|     | Unfiltered | 556 | 38  | 44  | 145 | 25 | 55  | 22 | 10  | 6.8 | 5.2 | 2.8 | 2.1 | 1.8 | 1.2 | 0.6 | 1.0 | 0.6 | 0.3 | 0.5 | 0.2 | 0.17 | 0.18 | 0.03 |
| PAV | Filtered   | 446 | 73  | 72  | 60  | 58 | 38  | 32 | 13  | 10  | 7.1 | 4.2 | 3.0 | 5.2 | 2.6 | 1.2 | 1.0 | 1.2 | 0.4 | 0.4 | 0.1 | 0.05 | 0.05 | 0.01 |
|     | Unfiltered | 612 | 38  | 68  | 141 | 44 | 25  | 25 | 10  | 8.3 | 4.8 | 3.1 | 2.3 | 4.8 | 2.5 | 1.0 | 1.0 | 1.1 | 0.3 | 0.6 | 0.2 | 0.22 | 0.22 | 0.04 |
| ARC | Filtered   | 382 | 93  | 60  | 41  | 34 | 27  | 49 | 12  | 8.5 | 4.7 | 8.6 | 4.2 | 1.5 | 2.1 | 1.2 | 1.0 | 0.8 | 0.4 | 0.7 | 0.1 | 0.04 | 0.04 | 0.01 |
|     | Unfiltered | 453 | 93  | 47  | 111 | 24 | 15  | 30 | 11  | 7.7 | 3.6 | 4.7 | 3.9 | 2.0 | 0.8 | 1.2 | 1.0 | 0.6 | 0.3 | 0.8 | 0.1 | 0.19 | 0.33 | 0.03 |
| MIL | Filtered   | 237 | 56  | 33  | 32  | 20 | 8.9 | 17 | 10  | 5.9 | 3.0 | 1.5 | 1.7 | 2.2 | 0.7 | 1.0 | 1.0 | 0.4 | 0.3 | 0.2 | 0.1 | 0.03 | 0.01 | 0.00 |
|     | Unfiltered | 330 | 53  | 41  | 73  | 17 | 7.6 | 16 | 9.0 | 5.1 | 2.7 | 1.5 | 1.5 | 3.5 | 0.6 | 0.9 | 1.0 | 0.4 | 0.2 | 0.5 | 0.1 | 0.17 | 0.12 | 0.02 |
